# Supplementary material
Source: Springer Nature journal article supplement (https://www.springermedizin.de/resource/supplementary/12889_2012_4648_MOESM1_ESM.pdf/9493028)
Supplement: MOESM1 [file 9493028]

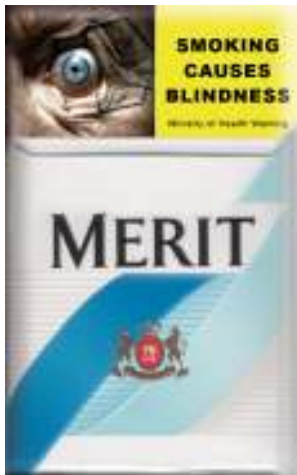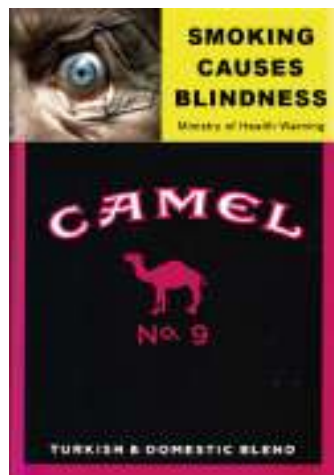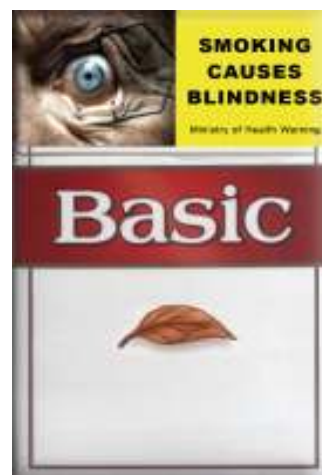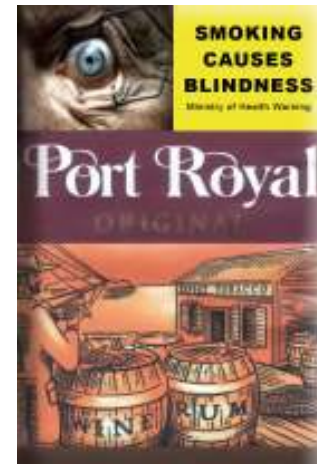

Young  
 Mature  
 Masculine  
 Feminine  
 Tough  
 Cool  
 Professional  
 Classy  
 Popular  
 Plain  
 Budget  
 Traditional  
 Relaxing  
 Sophisticated  
 Trendy

Young  
 Mature  
 Masculine  
 Feminine  
 Tough  
 Cool  
 Professional  
 Classy  
 Popular  
 Plain  
 Budget  
 Traditional  
 Relaxing  
 Sophisticated  
 Trendy

Young  
 Mature  
 Masculine  
 Feminine  
 Tough  
 Cool  
 Professional  
 Classy  
 Popular  
 Plain  
 Budget  
 Traditional  
 Relaxing  
 Sophisticated  
 Trendy

Young  
 Mature  
 Masculine  
 Feminine  
 Tough  
 Cool  
 Professional  
 Classy  
 Popular  
 Plain  
 Budget  
 Traditional  
 Relaxing  
 Sophisticated  
 Trendy
